# Supplementary material
Source: PubMed Central journal article supplement (PMC3591980)
Supplement: AEM.03695-12_zam999104184so1.pdf [file AEM.03695-12_zam999104184so1.pdf]

**Supplementary Figure 1:** Replica plating for confirmation of  $mc^2\Delta ilvH$  mutants. Twenty hygromycin sensitive colonies as observed in Figure 4D during replica plating were spotted in replicates on 7H10 agar containing i) only apramycin, ii) apramycin with BCAA (branched chain amino acids) and iii) apramycin with BCAA and hygromycin.

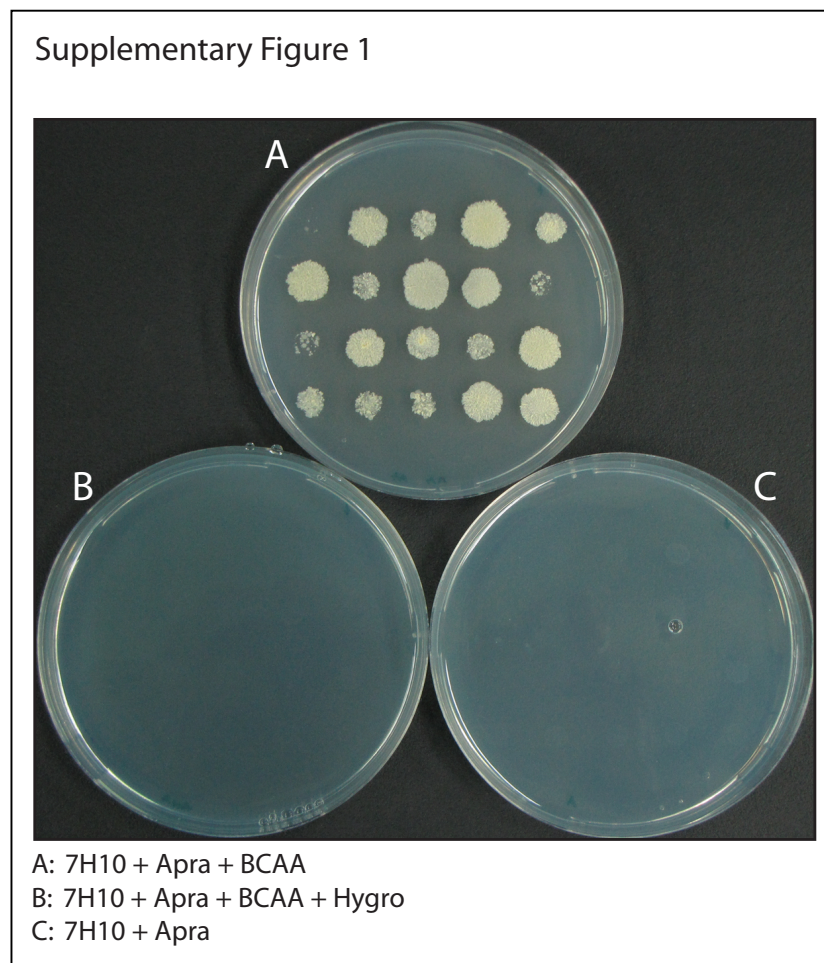

**Supplementary Table 1: Bacterial strains and plasmids used in this study**

|                                         | ANNOTATION                                                                                                                                                               | SOURCE                           |
|-----------------------------------------|--------------------------------------------------------------------------------------------------------------------------------------------------------------------------|----------------------------------|
| <b>Bacterial Strains</b>                |                                                                                                                                                                          |                                  |
| <i>E. coli</i> DH5 $\alpha$             | <i>Escherichia coli</i> strain used for cloning                                                                                                                          | Invitrogen                       |
| <i>E. coli</i> DH10B                    | <i>Escherichia coli</i> strain K12 substrain DH10B                                                                                                                       | Invitrogen                       |
| <i>M. smegmatis</i> mc <sup>2</sup> 155 | A mutant of <i>M. smegmatis</i> mc <sup>2</sup> 6 which can be efficiently transformed by plasmids                                                                       | (1)                              |
| <b>Vectors</b>                          |                                                                                                                                                                          |                                  |
| pENTR/D-TOPO <sup>®</sup>               | <i>E. coli</i> cloning vector, pENTR/ Directional TOPO Cloning Kit                                                                                                       | Invitrogen                       |
| pMV261apra                              | <i>E. coli</i> -mycobacteria shuttle plasmid, source of <i>apr</i> <sup>r</sup> gene cassette                                                                            | Kind gift from Prof. Jacobs, WR. |
| pVV16                                   | Shuttle plasmid, Source of <i>kan</i> <sup>r</sup> , <i>hyg</i> <sup>r</sup> , <i>oriE</i> , <i>oriM</i> and transcription terminator ( <i>Tt</i> ) cassettes            | (TBVRM, Colorado)                |
| pMV361                                  | L5 integration vector, Source of <i>int-attP</i>                                                                                                                         | (2)                              |
| pMC1s                                   | Shuttle plasmid, Source of constitutive P <sub>smvc</sub> promoter                                                                                                       | (3)                              |
| pSE100                                  | Shuttle plasmid, Source of P <sub>mvc1</sub> <i>tetO</i> promoter                                                                                                        | (4)                              |
| pMC1m                                   | Shuttle plasmid, Source of P <sub>imyc</sub> - <i>tetR</i>                                                                                                               | Kind gift from Dr. Ehrt          |
| p2Nil                                   | Recombination vector (non replicating), Source of P <sub>hsp60</sub> - <i>sacB</i>                                                                                       | (5)                              |
| pTrc <sub>narK2</sub> - <i>ung</i>      | pTrc-narK2 vector containing <i>ung</i> ORF                                                                                                                              | (6)                              |
| pST-H                                   | Shuttle vector carrying expanded MCS, for constitutive expression of proteins with N- and C- terminal peptide tags ( <i>hyg</i> <sup>r</sup> )                           | Present Study                    |
| pST-HT                                  | pST-H with P <sub>imyc</sub> <i>tetR</i> cloned in SnaBI site                                                                                                            | Present Study                    |
| pST-KH                                  | Shuttle vector carrying expanded MCS, for constitutive expression of proteins with N- and C- terminal peptide tags ( <i>hyg</i> <sup>r</sup> & <i>kan</i> <sup>r</sup> ) | Present Study                    |
| pST-KHT                                 | pST-KH with P <sub>imyc</sub> - <i>tetR</i> cloned in SnaBI site                                                                                                         | Present Study                    |
| pST-K                                   | Shuttle vector carrying expanded MCS, for constitutive expression of proteins with N- and C- terminal peptide tags ( <i>kan</i> <sup>r</sup> )                           | Present Study                    |
| pST-KT                                  | pST-K with P <sub>imyc</sub> - <i>tetR</i> cloned in SnaBI site                                                                                                          | Present Study                    |
| pST-2K                                  | Dual expression shuttle vector for constitutive co-expression of two proteins controlled by independent promoters                                                        | Present Study                    |
| pST-Ki                                  | pST-K derivative, <i>oriM</i> replaced with <i>attP-int<sub>mod</sub></i>                                                                                                | Present Study                    |
| pST-KiT                                 | pST-KT derivative, <i>oriM</i> replaced with <i>attP-int<sub>mod</sub></i>                                                                                               | Present Study                    |
| pST-KO                                  | Suicide delivery vector containing P <sub>hsp60</sub> - <i>sacB</i> ( <i>hyg</i> <sup>r</sup> ) and expanded MCS                                                         | Present Study                    |
| pST-K <sub>narK2</sub>                  | pST-K shuttle vector with hypoxia inducible P <sub>narK2</sub> promoter                                                                                                  | Present Study                    |

| <b>Plasmid Constructs</b>                         |                                                                                                                                                         |               |
|---------------------------------------------------|---------------------------------------------------------------------------------------------------------------------------------------------------------|---------------|
| pENTR-oriE                                        | pENTR construct, <i>E. coli</i> origin of replication                                                                                                   | Present Study |
| pENTR-oriM                                        | pENTR construct, pAL5000 based mycobacterial origin of replication                                                                                      | Present Study |
| pENTR-hyg <sup>r</sup> <sub>mod</sub>             | pENTR construct, modified hygromycin resistance gene                                                                                                    | Present Study |
| pENTR-EMH                                         | pENTR construct, containing <i>oriE</i> , <i>oriM</i> , <i>hyg<sup>r</sup><sub>mod</sub></i>                                                            | Present Study |
| pENTR-ESH                                         | pENTR-EMH derivative, <i>oriM</i> is replaced with P <sub>hsp60</sub> - <i>sacB</i>                                                                     | Present Study |
| pENTR-EMHP <sub>smvc</sub>                        | pENTR construct, <i>oriE</i> , <i>oriM</i> , <i>hyg<sup>r</sup></i> , P <sub>smvc</sub> promoter                                                        | Present Study |
| pENTR-EMHP <sub>myc1</sub> <i>tetO</i>            | pENTR construct, <i>oriE</i> , <i>oriM</i> , <i>hyg<sup>r</sup></i> , P <sub>myc1</sub> <i>tetO</i> promoter                                            | Present Study |
| pEMHP <sub>myc1</sub> <i>tetO</i>                 | pENTR sequence excised out of pENTR-EMHP <sub>myc1</sub> <i>tetO</i>                                                                                    | Present Study |
| pST-K- <i>pknK</i>                                | <i>M. tuberculosis pknK</i> cloned into XbaI-HindIII sites of the pST-K vector                                                                          | Present Study |
| pST-KT- <i>pknK</i>                               | <i>M. tuberculosis pknK</i> cloned in XbaI-HindIII sites of the pST-KT vector                                                                           | Present Study |
| pST-Ki- <i>pknK</i>                               | <i>M. tuberculosis pknK</i> cloned in XbaI-HindIII sites of the pST-Ki vector                                                                           | Present Study |
| pST-KiT- <i>pknK</i>                              | <i>M. tuberculosis pknK</i> cloned in XbaI-HindIII sites of the pST-KiT vector                                                                          | Present Study |
| pST-2K- <i>virS</i>                               | <i>M. tuberculosis virS</i> cloned in HindIII site of second MCS of pST-2K vector                                                                       | Present Study |
| pST-2K- <i>pknK-virS</i>                          | <i>M. tuberculosis</i> H37Rv <i>pknK</i> cloned in XbaI site of first MCS and <i>virS</i> cloned in HindIII site of second MCS, respectively.           | Present Study |
| pST-2K- <i>pknK</i> -K55M- <i>virS</i>            | <i>M. tuberculosis pknK</i> kinase inactive mutant cloned in XbaI site of first MCS and <i>virS</i> cloned in HindIII site of second MCS, respectively. | Present Study |
| pST-2K- <i>pknB KD</i>                            | <i>M. tuberculosis pknB</i> kinase domain cloned between NdeI-NotI sites of first MCS of pST-2K vector                                                  | Present Study |
| pST-2K- <i>garA</i>                               | <i>M. tuberculosis garA</i> is cloned in HindIII site of second MCS of pST-2K vector                                                                    | Present Study |
| pST-2K- <i>pknB KD-garA</i>                       | <i>M. tuberculosis pknB</i> kinase domain cloned in NdeI-NotI sites of first MCS and <i>garA</i> in HindIII site of second MCS, respectively.           | Present Study |
| pQE-5'- <i>apr</i> -3'- <i>ilvH</i>               | <i>Apr<sup>r</sup></i> sequence cloned in between 5' and 3' Flank sequences of <i>ilvH</i> in PstI-NotI sites of pQEII vector                           | Present Study |
| pST-KO-5'- <i>apr</i> -3'- <i>ilvH</i>            | 5'- <i>apr</i> -3' <i>ilvH</i> cassette excised from pQEII with SmaI-NotI and cloned into corresponding sites in pST-KO                                 | Present Study |
| pMV- <i>gfp<sub>aav</sub></i>                     | <i>gfp<sub>aav</sub></i> cloned in pMV shuttle vector                                                                                                   |               |
| pST-K <sub>narK2</sub> - <i>gfp<sub>aav</sub></i> | pST-K shuttle vector with hypoxia inducible P <sub>narK2</sub> promoter and <i>gfp<sub>aav</sub></i> cloned between EcoRI-HindIII sites                 | Present Study |

**Supplementary Table 2: List of primers used in the study**

| Name                      | Description                                                                                                  | Sequence                                           |
|---------------------------|--------------------------------------------------------------------------------------------------------------|----------------------------------------------------|
| OriE F (Forward)          | <i>E. coli</i> ori F - HpaI, SpeI                                                                            | CACCGTTAACACTAGTTCCTACTGAGCGTCAG                   |
| OriE R (Reverse)          | <i>E. coli</i> ori R-SnaBI, MluI                                                                             | ATGTACGTAACGCGTTGCGCTCGGTCGTTT                     |
| OriM F                    | <i>M. tuberculosis</i> ori F- SnaBI                                                                          | CACCTACGTAGAGCCCACCAGCTCCGTAAG                     |
| OriM R                    | <i>M. tuberculosis</i> ori R- KpnI                                                                           | CCAGGTACCGCCACGGATGCCACCACAAGC                     |
| Hyg <sup>r</sup> F        | Hygromycin resistance F- KpnI                                                                                | CACCGGTACCTTGATCCGGCATGAGATTATC                    |
| Hyg <sup>r</sup> R        | Hygromycin resistance R- ScaI                                                                                | ACTAGTACTGATCCGGGGGGCGTCAGGCGC                     |
| Hyg <sup>r</sup> -EcoRI F | EcoRI site mutagenesis primer F                                                                              | CTGCGGAACGACCAGGAGTTCTGGGAGCCGCTG                  |
| Hyg <sup>r</sup> -EcoRI R | EcoRI site mutagenesis primer R                                                                              | CAGCGGCTCCCAGAACTCCTGGTCGTTCCGAG                   |
| TetR F                    | Tet repressor- SnaBI                                                                                         | CACCTACGTAAATATTGGATCGTCGCACCGGG                   |
| TetR R                    | Tet repressor- SnaBI                                                                                         | GTATACGTAGCCCATGGTCATTAAGACCCAC                    |
| TetR-Bam,Kpn&XbaI F       | BamHI, KpnI and XbaI site mutagenesis F                                                                      | CGACCCCTCTGCCACGGATCGGAGGAATCACTTCGCAATGTCAAGATTAG |
| TetR-Bam,Kpn&XbaI R       | BamHI, KpnI and XbaI site mutagenesis R                                                                      | CTAATCTTGACATTGCGAAGTGATTCCTCCGATCCGTGGCAGGAGGGTGC |
| TetR-HindIII F            | HindIII site mutagenesis primer F                                                                            | CGT AAA CTC GCC CAG AAA CTT GGT GTA GAG CAG        |
| TetR-HindIII R            | HindIII site mutagenesis primer R                                                                            | CTGCTCTACACCAAGTTTCTGGGCGAGTTTACG                  |
| TetR-ApaI F               | ApaI site mutagenesis primer F                                                                               | GGCATGTAAAAAATAAGCGAGCCCTGCTCGACGCC                |
| TetR-ApaI R               | ApaI site mutagenesis primer R                                                                               | GGCGTCGAGCAGGGCTCGCTTATTTTTTACATGCC                |
| TetR-SnaBI F              | SnaBI site mutagenesis primer F                                                                              | CTGGCAAGATTTTTTGCGTAATAACGCTAAAAG                  |
| TetR-SnaBI R              | SnaBI site mutagenesis primer R                                                                              | CTTTTAGCGTTATTACGCAAAAAATCTTGCCAG                  |
| TetR-NdeI F               | NdeI site mutagenesis primer F                                                                               | GGCCTTGAATTGATCATCTGCGGATTAGAAAAAC                 |
| TetR-NdeI R               | NdeI site mutagenesis primer R                                                                               | GTTTTTCTAATCCGCAGATGATCAATTCAAGGCC                 |
| attP-Integrase F          | Integrase gene along with attP site F- SnaBI                                                                 | CACCTACGTATGCGTTGCAACCGCGTATGC                     |
| attP-Integrase R          | Integrase gene along with attP site R- KpnI/Acc65I                                                           | CGAGGTACCTGGTTCTTCGCGTACTGACAAG                    |
| Int-BamHI F               | BamHI site mutagenesis primer F                                                                              | CAGCGCAGCGGGAAGATCCAAGCCTCATA                      |
| Int-BamHI R               | BamHI site mutagenesis primer R                                                                              | TATGAGGCTTGGATCTTCCCGTGCCTG                        |
| Int-PstI F                | PstI site mutagenesis primer F                                                                               | TGAGGTACTACGCGTTGCAGACCTACGACA                     |
| Int-PstI R                | PstI site mutagenesis primer R                                                                               | TGTCGTAGGTCTGCAACGCGTAGTACCTCA                     |
| Int-NdeI F                | NdeI site mutagenesis primer F                                                                               | GTCTGCCGACCACAAATGGGCCGGTCAAGA                     |
| Int-NdeI R                | NdeI site mutagenesis primer R                                                                               | TCTTGACCGGCCCATTTGTGGTTCGGCAGAC                    |
| P <sub>myc1</sub> tetO F  | P <sub>myc1</sub> /P <sub>smyc</sub> promoter with/without tet operator sequence primer F- PvuII, ScaI       | CACCCAGCTGAGTACTAATATTGGATCGTCGGCACCGTCAC          |
| P <sub>myc1</sub> tetO R  | P <sub>myc1</sub> /P <sub>smyc</sub> promoter with/without tet operator sequence primer R- HpaI, ApaI & SphI | GTTAACGGGCCCCGCATGCGGATCGTGCTCATTTCCGGGCGGGC       |
| Oligomer-A F              | RBS, Hexa His-tag, NdeI overhang (oh) DNA oligomer F                                                         | CGGAGGAATCACTTCGCAATGCACCACCACCACCA                |
| Oligomer-A R              | RBS, Hexa His-tag, NdeI oh DNA oligomer R                                                                    | TATGGTGGTGGTGGTGGTGCATTGCGAAGAGATTCTCCGCATG        |
| Oligomer-B F              | MCS primer containing NdeI, BamHI, EcoRV, XbaI, NotI, PvuII and ApaI sites F                                 | TATGGGATCCGATATCTCTAGAGCGGCCGCACAGCTGGGGCC         |
| Oligomer-B R              | MCS primer containing NdeI, BamHI, EcoRV,                                                                    | CCAGCTGTGCGGCCGCTCTAGAGATATCGGATCCCA               |

|                           |                                                                                          |                                                             |
|---------------------------|------------------------------------------------------------------------------------------|-------------------------------------------------------------|
|                           | XbaI, NotI, PvuII and ApaI oh R                                                          |                                                             |
| Oligomer-C F              | MCS primer containing ApaI oh, EcoRI, PstI, PmlI, PacI, HindIII, stop and HpaI sites F   | CGAATTCCTGCAGCACGTGTTAATTAAGCTTTAAGTT                       |
| Oligomer-C R              | MCS primer containing ApaI oh, EcoRI, PstI, PmlI, PacI, HindIII, stop and HpaI sites F   | AACTTAAAGCTTAATTAACACGTGCTGCAGGAATTCGGGCC                   |
| Oligomer-D F              | FLAG-tag DNA oligomer F                                                                  | AGCTTGACTACAAGGACGACGACGACAAGTAAA                           |
| Oligomer-D R              | FLAG-tag DNA oligomer R                                                                  | AGCTTTACTTGTCTGTCGTCGTCCTTGTAGTCA                           |
| Oligomer-E F              | Transcription terminator DNA oligomer F                                                  | GGCCGCATAAAAACGAAAGGCTCAGTCGAAAGACTGGCCTTTCGTTTTATAG        |
| Oligomer-E R              | Transcription terminator DNA oligomer R                                                  | GGCCCTATAAAAACGAAAGGCCAGTCTTTCGACTGAGCCTTTCGTTTTATGC        |
| pST-2K-MCS1 F             | MCS1 oligomer containing NdeI oh, BamHI, EcoRV, XbaI, NotI, stop, PvuII and ApaI sites F | TATGGGATCCGATATCTCTAGAGCGGCCGCATAACAGCTGCAGGGGCC            |
| pST-2K-MCS1 R             | MCS1 oligomer containing NdeI oh, BamHI, EcoRV, XbaI, NotI, stop, PvuII and ApaI sites R | CCTGCAGCTGTTATGCGGCCGCTCTAGAGATATCGGATCCCA                  |
| pST-2K-MCS2 F             | MCS2 oligomer containing ApaI oh, RBS, EcoRI, PstI, PmlI, PacI, HindIII, stop, HpaI oh F | CGGAGGAATCACTTCGCAATGGAATTCCTGCAGCACGTGTTAATTAAGCTTTAAGTT   |
| pST-2K-MCS2 R             | MCS2 oligomer containing ApaI oh, RBS, EcoRI, PstI, PmlI, PacI, HindIII, stop, HpaI oh R | AACTTAAAGCTTAATTAACACGTGCTGCAGGAATTCATTGCGAAGTGATTCTCCGGGCC |
| pST-KO-MCS F              | pST-KO vector MCS DNA oligomer F                                                         | CTAGCCATGGATCCC GGCCCTGCAGCGGCCGCTCTAGATTAATTA              |
| pST-KO-MCS R              | pST-KO vector MCS DNA oligomer R                                                         | CTAGTTAATTAATCTAGAGCGCCGCTGCAGGGCCCGGATCCATGG               |
| PknB KD F                 | PknB forward primer F- NdeI                                                              | CGAGATAGCCATATGACCACCCCTTCCACCTGTCC                         |
| PknB KD R                 | PknB kinase domain (1-330 aa) R- HindIII                                                 | GCGGCCGCAAGCTTAGCCCACCGAACCGATGCTGCG                        |
| GarA F                    | GarA primer F- NotI                                                                      | CACCGCGGCCGCACATATGGTAACGGACATGAACCCGG                      |
| GarA R                    | GarA primer R- PvuI                                                                      | CGATCGACATCGCGGCCGCTTCGGGGCTATCGGGTG                        |
| P <sub>hsp60-sacB</sub> F | Hsp60 promoter with SacB gene primer F                                                   | CACCGCATGCGTGACCACAACGACGCGCCC                              |
| P <sub>hsp60-sacB</sub> R | Hsp60 promoter with SacB gene primer R                                                   | ACTGCATGCGGTTAGGAATACGGTTAGCC                               |
| IlvH F                    | IlvH primer F                                                                            | CACCCATATGAGTAACGGAACCCCCACCCAC                             |
| IlvH R                    | IlvH primer R                                                                            | GGTGCGGCCGCTTACTTCGCTGCGCCGATGCC                            |
| IlvH 5' Flank F           | IlvH knockout 5' Flank F                                                                 | CACCTGCAGGATCGCGCTGGGCACGCGGTTTCG                           |
| IlvH 5' Flank R           | IlvH knockout 5' Flank R                                                                 | GGTAGTACTGCGCCGACCGCGAGCGACTGG                              |
| Apra <sup>r</sup> -F      | Apramycin res F                                                                          | CACCAGTACTACGTAGTTATCGAATTCCTGC                             |
| Apra <sup>r</sup> -R      | Apramycin res R                                                                          | GATAGTACTTGGATCCCCCGTGTGCCC                                 |
| IlvH 3' Flank F           | IlvH knockout 3' Flank F                                                                 | CACCAGTACTCTGGAGCCGATGGCATCCG                               |
| IlvH 3' Flank R           | IlvH knockout 3' Flank R                                                                 | GGTGCGGCCGCATCGGGTGCTCGGCGTTGGCC                            |

## References.

1. **Snapper, S. B., L. Lugosi, A. Jekkel, R. E. Melton, T. Kieser, B. R. Bloom, and W. R. Jacobs, Jr.** 1988. Lysogeny and transformation in mycobacteria: stable expression of foreign genes. *Proc Natl Acad Sci U S A* **85**:6987-91.
2. **Stover, C. K., V. F. de la Cruz, T. R. Fuerst, J. E. Burlin, L. A. Benson, L. T. Bennett, G. P. Bansal, J. F. Young, M. H. Lee, G. F. Hatfull, and et al.** 1991. New use of BCG for recombinant vaccines. *Nature* **351**:456-60.
3. **Ehrt, S., X. V. Guo, C. M. Hickey, M. Ryou, M. Monteleone, L. W. Riley, and D. Schnappinger.** 2005. Controlling gene expression in mycobacteria with anhydrotetracycline and Tet repressor. *Nucleic Acids Res* **33**:e21.

4. **Guo, X. V., M. Monteleone, M. Klotzsche, A. Kamionka, W. Hillen, M. Braunstein, S. Ehrt, and D. Schnappinger.** 2007. Silencing *Mycobacterium smegmatis* by using tetracycline repressors. *J Bacteriol* **189**:4614-23.
5. **Parish, T., and N. G. Stoker.** 2000. Use of a flexible cassette method to generate a double unmarked *Mycobacterium tuberculosis* tlyA plcABC mutant by gene replacement. *Microbiology* **146 ( Pt 8)**:1969-75.
6. **Kurthkoti, K., and U. Varshney.** 2010. Detrimental effects of hypoxia-specific expression of uracil DNA glycosylase (Ung) in *Mycobacterium smegmatis*. *J Bacteriol* **192**:6439-46.
